# Supplementary material
Source: publisher site journal article supplement (https://www.dovepress.com/article/372266)
Supplement: Supplementary file 1 [file get_supplementary_file.php]

**SUPPLEMENTARY DATA**

**Supplementary Figure 1.** Study Design


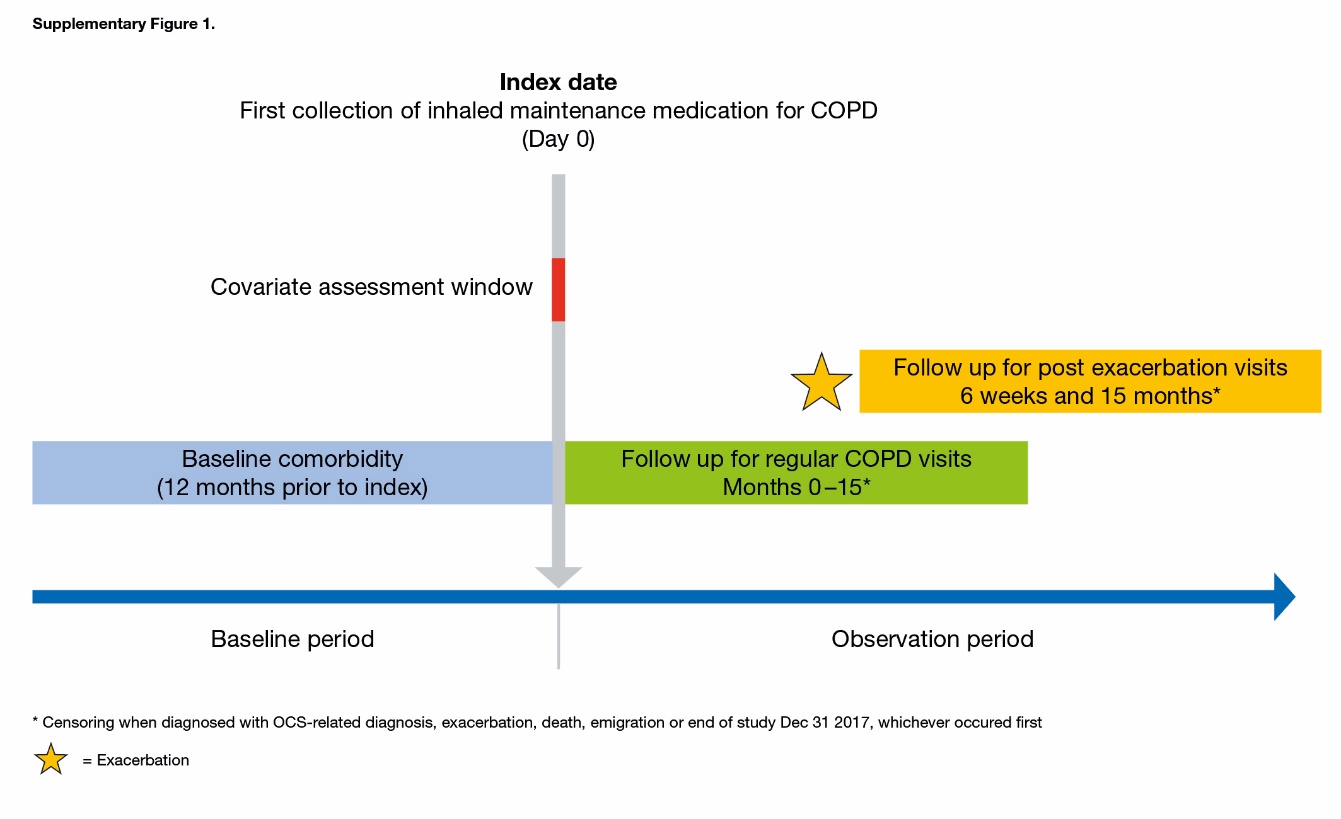


**Supplementary Table 1**. Incidence rate ratios (IRR) of COPD follow-up visits up to 15 months after index date and after an exacerbation

|  | **IRR (95% CI)** | |
| --- | --- | --- |
|  | **After the index date** | **After an exacerbation** |
| Gender |  |  |
| Males | 1.00 (ref) | 1.00 (ref) |
| Females | 0.92 (0.88-0.97) | 0.95 (0.90-0.99) |
| Calendar year (cont) | 1.11 (1.10-1.12) | 1.10 (1.09-1.11) |
| Age at index (years) |  |  |
| 40-55 | 1.00 (ref) | 1.00 (ref) |
| >55-70 | 1.15 (1.05-1.26) | 1.12 (1.02-1.22) |
| >70-85 | 1.31 (1.20-1.43) | 1.24 (1.13-1.36) |
| >85 | 1.56 (1.38-1.75) | 1.46 (1.29-1.64) |
| Charlson comorbidity index |  |  |
| CCI: 0-1 | 1.00 (ref) | 1.00 (ref) |
| CCI: 2 | 1.05 (0.99-1.11) | 1.05 (0.99-1.12) |
| CCI: 3 | 1.04 (0.96-1.12) | 1.05 (0.97-1.13) |
| CCI: 4 | 0.91 (0.81-1.01) | 0.91 (0.81-1.02) |
| CCI: 5+ | 1.21 (1.08-1.35) | 1.21 (1.08-1.35) |
| COPD treatment collected at index |  |  |
| LAMA or LABA | 1.00 (ref) |  |
| LAMA+LABA | 1.31 (1.16-1.47) |  |
| ICS | 0.63 (0.58-0.68) |  |
| ICS+LAMA or ICS+LABA | 0.79 (0.75-0.84) |  |
| ICS+LAMA+LABA | 1.09 (1.01-1.18) |  |
